# Supplementary material
Source: PubMed Central journal article supplement (PMC7132330)
Supplement: NIHMS1565189-supplement-Suppl.pdf [file NIHMS1565189-supplement-Suppl.pdf]

## **Supplemental Figures**

**eIF4A inhibitors suppress cell cycle feedback response and acquired resistance to CDK4/6 inhibition in cancer**

Kong et al

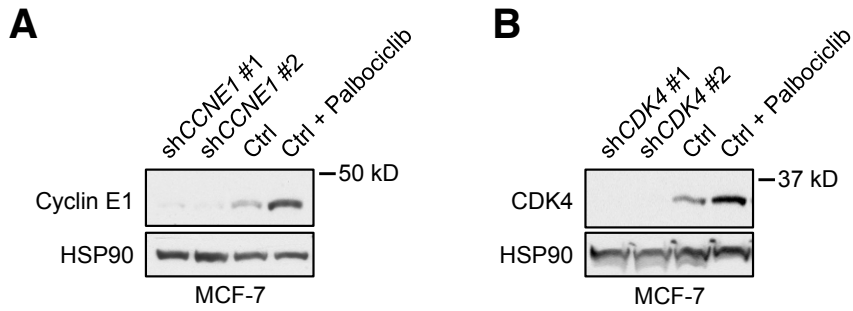

**Supplemental Figure 1. Validation of cyclin E and CDK4 signals with RNAi**

- A) Immunoblot verifying a low-molecular-weight isoform of cyclin E1 (~ 45 kDa) upregulation after palbociclib treatment. Cyclin E1 is suppressed upon *CCNE1* knockdown using two independent shRNAs. Cells were treated with 300 nM palbociclib for 24 hours.
- B) Immunoblot verifying CDK4 upregulation after palbociclib treatment. CDK4 is suppressed upon *CDK4* knockdown using two independent shRNAs. Cells were treated with 300 nM palbociclib for 24 hours.

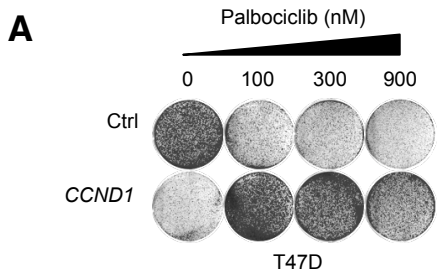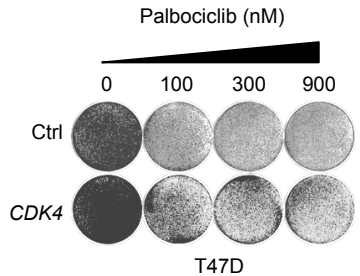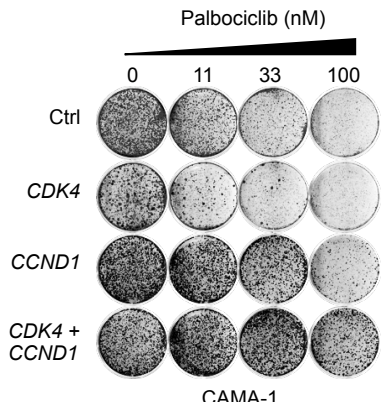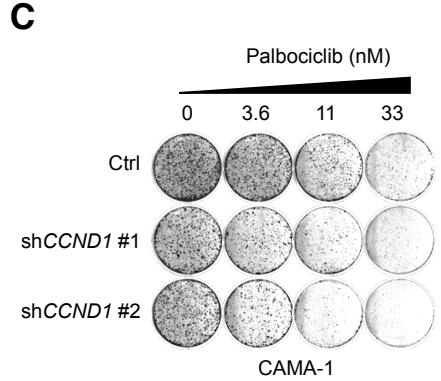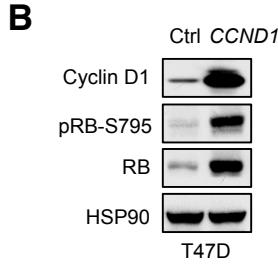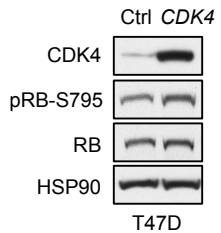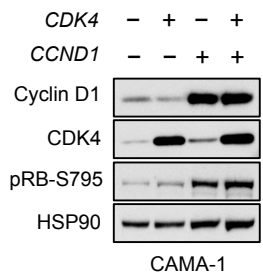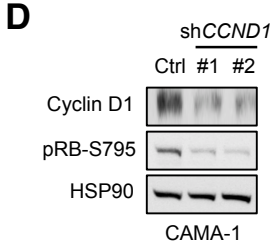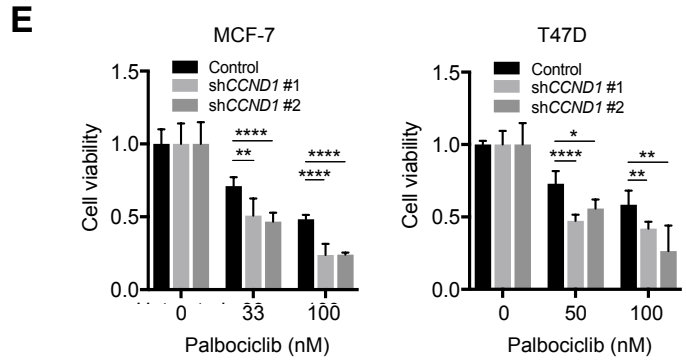

**Supplemental Figure 2. Cyclin D1 dictates response to palbociclib and is limiting in the formation of CDK4/6- Cyclin D1 complexes in ER-positive breast cancer.**

- A) Long-term colony formation assays showing resistance to palbociclib after overexpression of *CCND1* (top panel) or *CDK4* (middle panel) in T47D cells or overexpression of *CDK4*, *CCND1*, and their combination (bottom panel) in CAMA-1 cells. Cells were seeded and grown in the presence of palbociclib for 8-14 days. Palbociclib was refreshed every 3 days.
- B) Immunoblot analysis of overexpression of *CDK4*, *CCND1*, or their combination in T47D or CAMA-1 cells.
- C) Long-term colony formation assays showing CAMA-1 sensitivity to palbociclib after knockdown of *CCND1* utilizing two independent shRNAs. CAMA-1 cells were grown for 14-18 in the presence of palbociclib. Palbociclib was refreshed every 3 days.
- D) Immunoblot showing cyclin D1 knockdown using two independent shRNAs in CAMA-1 cells.
- E) Cell viability assays showing increased sensitivity to palbociclib after *CCND1* knockdown in MCF-7 and T47D cells. *CCND1* was perturbed using two independent shRNAs and treated with two doses of palbociclib. Cell viability was assessed with CellTiter-Blue. Error bars represent mean  $\pm$  standard deviation. \*  $p < 0.05$ ; \*\*  $p < 0.01$ ; \*\*\*\*  $p < 0.0001$ ; by Student's t-test, unpaired, two-sided.

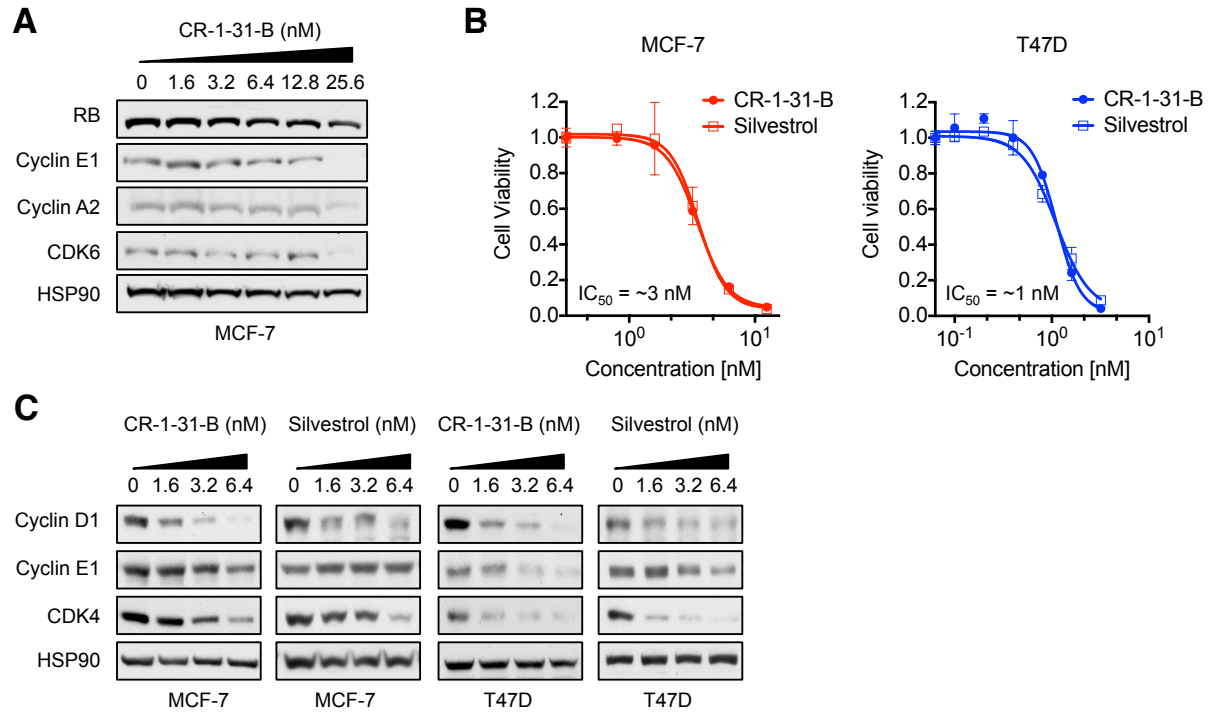

**Supplemental Figure 3. Rocaglates preferentially suppresses protein expression of cyclin D1, CDK4, and cyclin E1.**

- A) Immunoblot analysis showing cyclin E1 and other effectors in MCF-7 cells can be inhibited at higher concentrations of CR-1-31-B. Cells were treated for 24 hours at the indicated drug concentrations.
- B) Cell viability assays of MCF-7 and T47D cells treated with increasing concentrations of CR-1-31-B or silvestrol. Cells were treated for 7-8 days, and cell viability was determined using CellTiter-Blue. Error bars represent mean  $\pm$  standard deviation.
- C) Western blot showing similar degree of protein suppression of cell cycle regulators by CR-1-31-B and silvestrol. MCF-7 and T47D cells were treated with CR-1-31-B or silvestrol for 24 hours at the indicated drug concentrations.

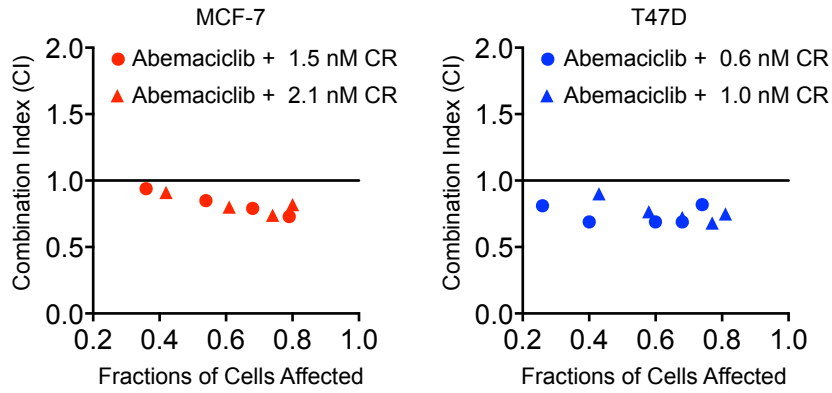

**Supplemental Figure 4. Synergism between a second CDK4/6 inhibitor, Abemaciclib, and CR-1-31-B**

Isobologram synergy analysis showing abemaciclib synergizes with CR-1-31-B at multiple dose combinations. CR= CR-1-31-B.

**A**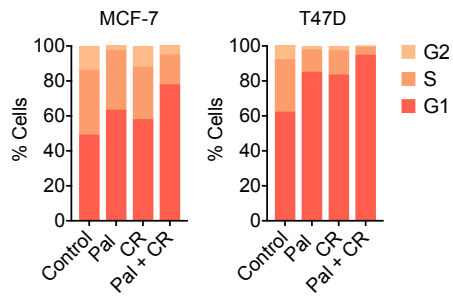**B**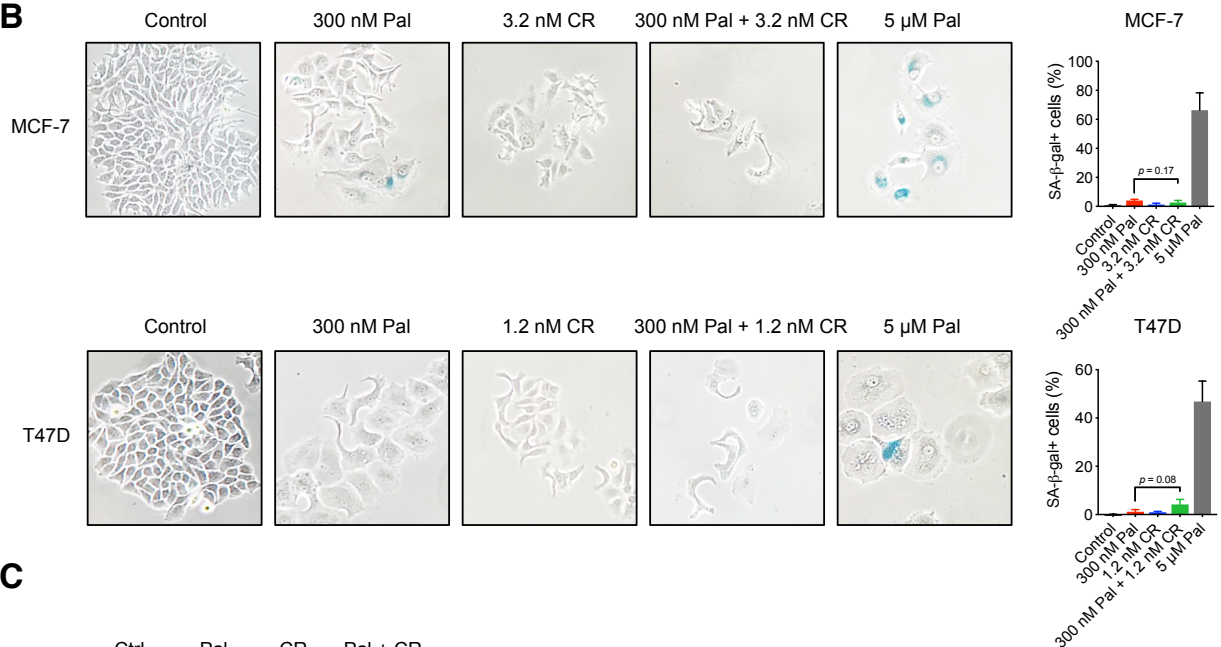**C**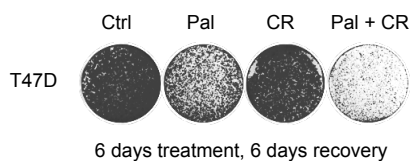

### Supplemental Figure 5. Functional cell cycle effects of palbociclib and/or CR-1-31-B treatment in ER-positive breast cancer

- Cell cycle analysis of MCF-7 and T47D cells. Cells were treated with 300 nM palbociclib, 3.2 nM CR-1-31-B, or combination for 72 hours. Percentage of cells in G1, S, and G2 cell cycle phases are as denoted.
- Senescence-associated  $\beta$ -galactosidase staining of MCF-7 and T47D cells treated with indicated doses of palbociclib and/or CR-1-31-B for 7 days. Right panel: quantification of senescence-associated  $\beta$ -galactosidase stained positive cells.
- Drug washout assay of T47D cells. T47D cells were treated with 100 nM palbociclib, 1.6 nM CR-1-31-B or combination for 6 days, after which cells were washed and refreshed with regular media for 6 days recovery.

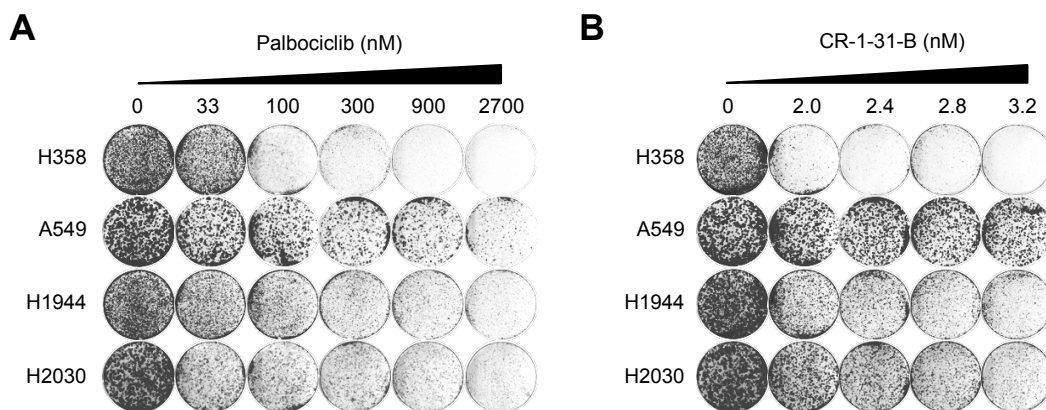

**Supplemental Figure 6. Sensitivity of *KRAS*-mutant non-small cell lung cancers to palbociclib and CR-1-31-B**

Colony formation assays of *KRAS*-mutant non-small cell lung cancers after treatment with palbociclib (A) or CR-1-31-B (B). Cells were seeded for colony formation and treated with palbociclib or CR-1-31-B for 8-14 days. Drugs were refreshed every 3 days.



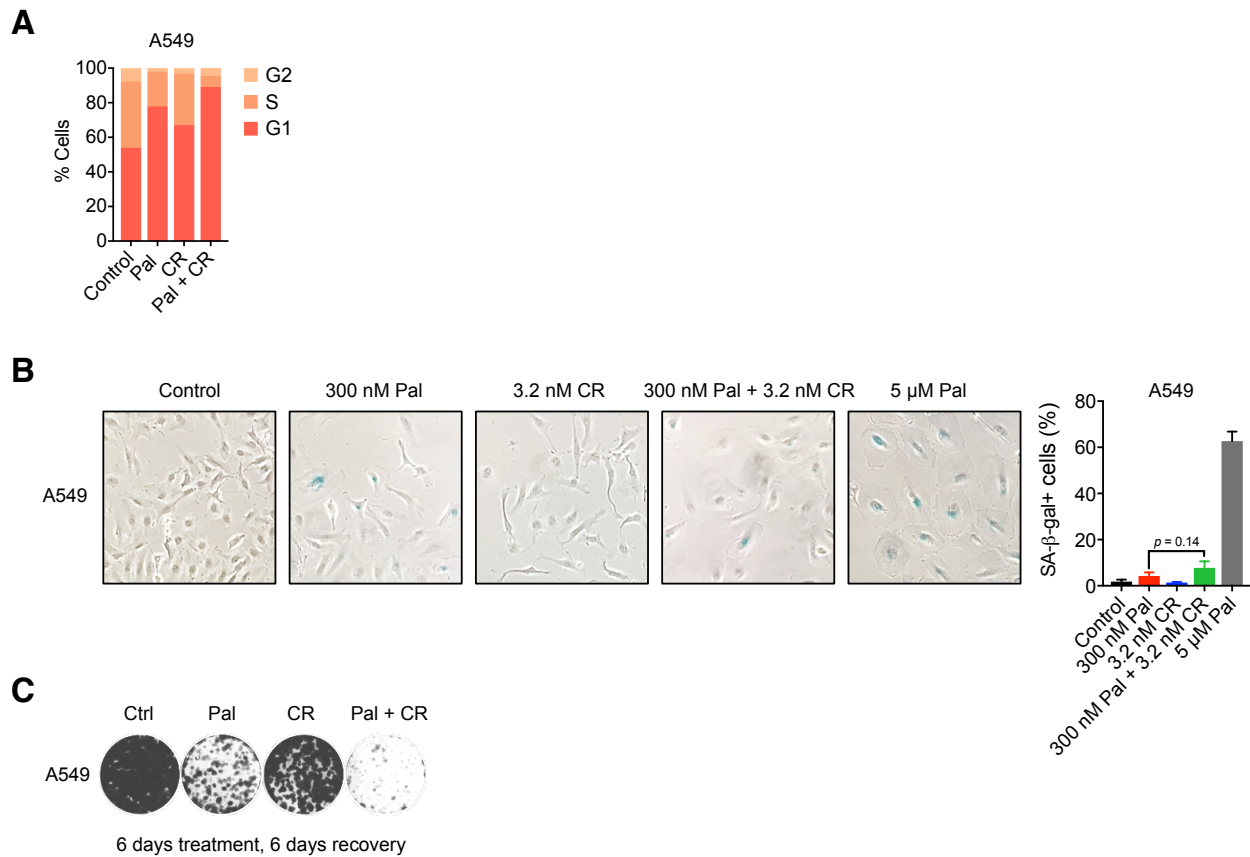

**Supplemental Figure 7. Functional cell cycle effects of palbociclib and/or CR-1-31-B treatment in NSCLC**

- A) Cell cycle analysis of A549 cells treated with 300 nM palbociclib, 3.2 nM CR-1-31-B, or combination for 72 hours. Percentage of cells in G1, S, and G2 cell cycle phases are as denoted.
- B) Senescence-associated  $\beta$ -galactosidase staining of A549 cells treated with indicated doses of palbociclib and/or CR-1-31-B for 7 days. Right panel: quantification of senescence-associated  $\beta$ -galactosidase stained positive cells.
- C) Drug washout assay of A549 cells. A549 cells were treated with 100 nM palbociclib, 3.2 nM CR-1-31-B or combination for 6 days, after which cells were washed and refreshed with regular media for 6 days recovery.

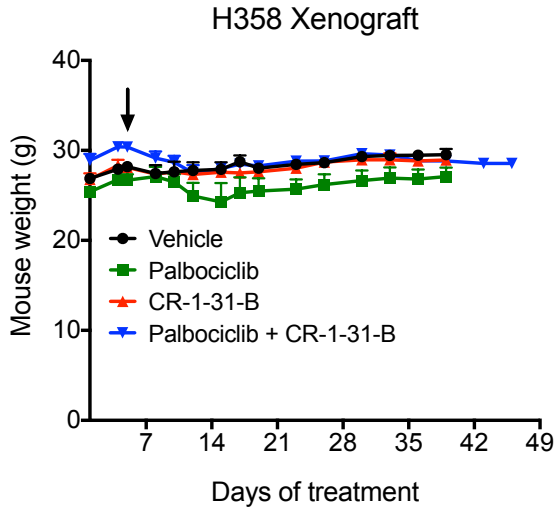

**Supplemental Figure 8. Weights of subcutaneous xenografted NSG mice treated with palbociclib, CR-1-31-B, or their combination.**

NSG mice were weighed twice a week to monitor changes in body weight in response to drug treatment over the xenograft period. The downward arrow indicates the start of drug treatment.

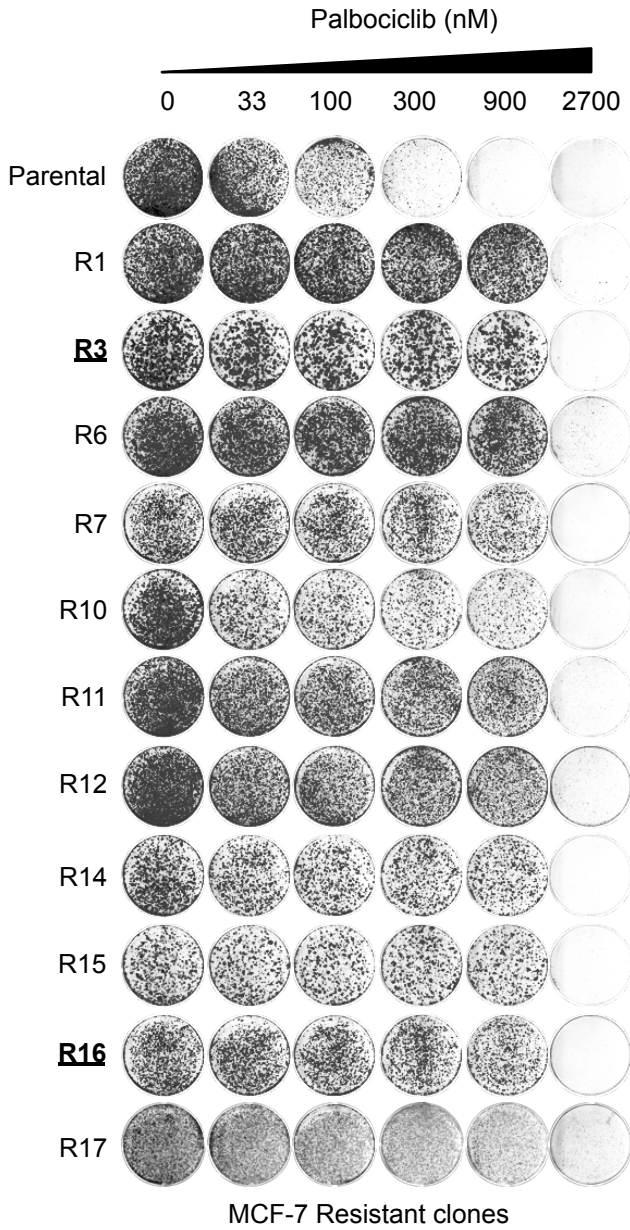

**Supplemental Figure 9. Colony formation panel of palbociclib-resistant MCF-7 clones**

11 palbociclib-resistant MCF-7 clones and their response to increasing doses of palbociclib. Cells were seeded and treated with palbociclib for 10-14 days at the indicated concentrations. Palbociclib was refreshed every 3 days.

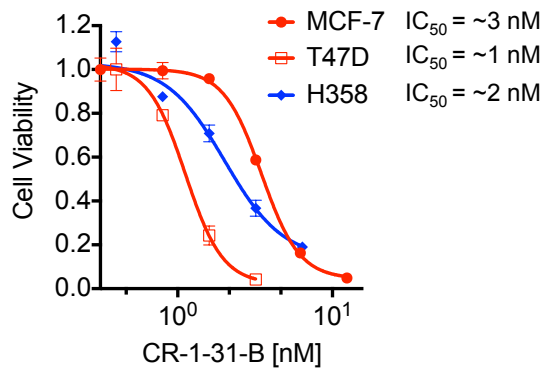

**Supplemental Figure 10. Cell viability assay of CR-1-31-B response.**

Comparison of cell viability and CR-1-31-B  $IC_{50}$  of H358 cells to ER<sup>+</sup> breast cancer cell lines MCF-7 and T47D. Cells were treated with CR-1-31-B for 7-8 days, and cell viability was determined using CellTiter-Blue. Error bars represent mean  $\pm$  standard deviation.
